# Supplementary material for: LEA Detection and Tracking Method for Color-Independent Visual-MIMO
Source: MDPI journal article supplement (doi:10.3390/s16071027), 2016-07-02
Supplement: s1 [file s1]

# Supplementary Materials: LEA Detection and Tracking Method for Color-Independent Visual-MIMO

Jai-Eun Kim, Ji-Won Kim and Ki-Doo Kim

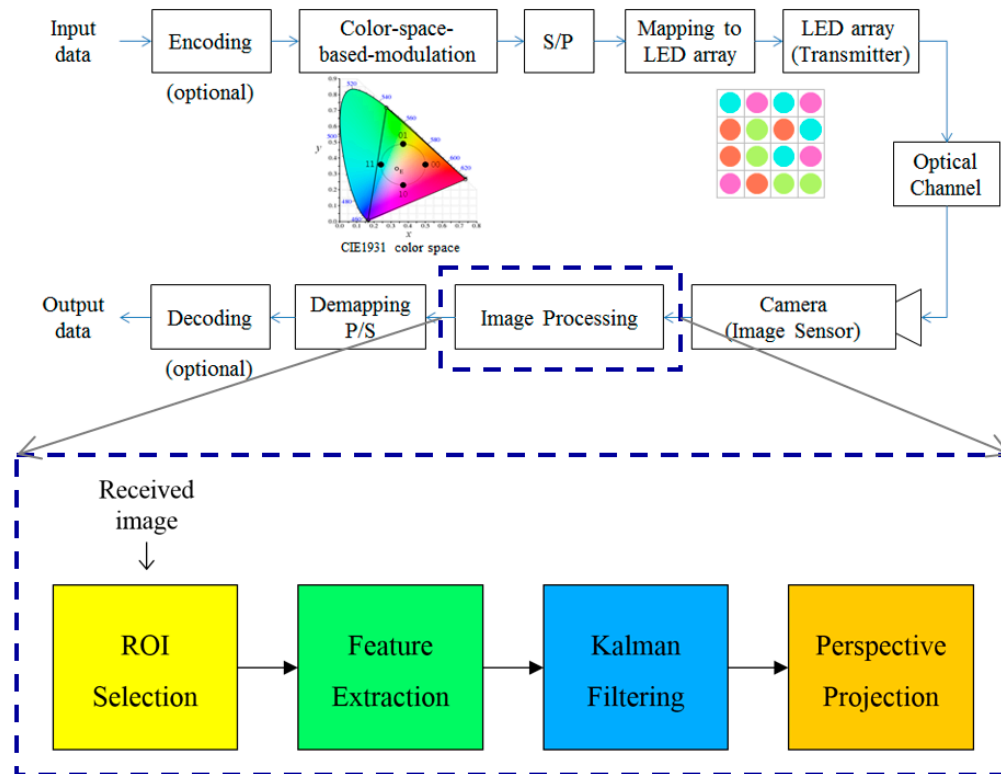

**Figure S1.** The illustration of LEA detection and tracking method for color-independent visual-MIMO.
